# Supplementary material for: Occurrence and Distribution of Antibiotics in a Tropical Mariculture Area of Hainan, China: Implications for Risk Assessment and Management
Source: MDPI journal article supplement (doi:10.3390/toxics11050421), 2023-05-01
Supplement: s1 [file s1]

Table S1 MRM parameters and standard curves for antibiotic analysis

| English name of antibiotics | Abbreviations | Q1    | Q3    | DP  | CE | Standard Curve                                        |
|-----------------------------|---------------|-------|-------|-----|----|-------------------------------------------------------|
| Orbifloxacin                | TCI           | 396   | 352   | 80  | 24 | $y = 8.94024e^4 x - 21821.91607$ ( $R^2 = 0.99941$ )  |
|                             |               | 396   | 295.2 | 80  | 32 |                                                       |
| Pipemidic Acid              | PIP           | 304.2 | 286.2 | 80  | 25 | $y = 6.45010e^4 x - 7.26468e^5$ ( $R^2 = 0.99803$ )   |
|                             |               | 304.2 | 217.1 | 80  | 31 |                                                       |
| Danofloxacin                | DAN           | 358.1 | 340.1 | 77  | 30 | $y = 1.72249e^5 x - 3.95064e^6$ ( $R^2 = 0.98491$ )   |
|                             |               | 358.1 | 314.1 | 77  | 24 |                                                       |
| Oxolinic acid               | OXO           | 262   | 244.1 | 70  | 26 | $y = 6.82130e^4 x + 4482.60440$ ( $R^2 = 0.99884$ )   |
|                             |               | 262   | 216.1 | 70  | 40 |                                                       |
| Enrofloxacin                | ENR           | 360.1 | 316.1 | 80  | 28 | $y = 1.07375e^5 x - 1.06647e^6$ ( $R^2 = 0.99951$ )   |
|                             |               | 360.1 | 245.1 | 80  | 36 |                                                       |
| Flumequin                   | FLU           | 262.1 | 244.1 | 77  | 23 | $y = 1.54569e^5 x + 12639.05199$ ( $R^2 = 0.99921$ )  |
|                             |               | 262.1 | 202.1 | 77  | 42 |                                                       |
| Fleroxacin                  | FLE           | 370   | 326.1 | 80  | 27 | $y = 4.77205e^4 x - 5.27761e^5$ ( $R^2 = 0.99908$ )   |
|                             |               | 370   | 269.2 | 80  | 35 |                                                       |
| Ciprofloxacin               | CIP           | 332.2 | 231   | 115 | 50 | $y = 3.31473e^4 x - 3.99354e^5$ ( $R^2 = 0.99701$ )   |
|                             |               | 332.2 | 288.1 | 115 | 26 |                                                       |
| Lomefloxacin                | LOM           | 352   | 265   | 80  | 33 | $y = 8.02757e^4 x + -2.82282e^5$ ( $R^2 = 0.99838$ )  |
|                             |               | 352   | 308.1 | 80  | 28 |                                                       |
| Marbofloxacin               | MAR           | 363.1 | 320.1 | 80  | 23 | $y = 4.64285e^4 x + -4.11989e^5$ ( $R^2 = 0.99713$ )  |
|                             |               | 363.1 | 72    | 80  | 46 |                                                       |
| Nalidixic acid              | NAL           | 233   | 215   | 68  | 18 | $y = 9.06446 x + -23.07866$ ( $R^2 = 0.99420$ )       |
|                             |               | 233   | 187   | 68  | 34 |                                                       |
| Norfloxacin                 | NOR           | 320.1 | 302.3 | 140 | 27 | $y = 23341.23907 x + -2.86223e^5$ ( $R^2 = 0.99801$ ) |

|                    |     |       |       |     |    |                                                |
|--------------------|-----|-------|-------|-----|----|------------------------------------------------|
|                    |     | 320.1 | 276.1 | 140 | 24 |                                                |
| Pefloxacin         | PEF | 334.1 | 316.1 | 80  | 27 | $y = 5.87854e4 x + -7.68300e5$ (r = 0.99740)   |
|                    |     | 334.1 | 290.2 | 80  | 25 |                                                |
| Sarafloxacin       | SAR | 386.2 | 342.3 | 100 | 25 | $y = 7.04559e4 x + -3.86021e5$ (r = 0.99949)   |
|                    |     | 386.2 | 299   | 100 | 38 |                                                |
| Difloxacin         | DIF | 400.1 | 356.1 | 80  | 28 | $y = 8.89290e4 x + -3.65391e5$ (r = 0.99831)   |
|                    |     | 400.1 | 299.1 | 80  | 41 |                                                |
| Sparfloxacin       | SPA | 393   | 349.2 | 80  | 30 | $y = 7.13468e4 x + -3.11537e5$ (r = 0.99830)   |
|                    |     | 393   | 292   | 80  | 38 |                                                |
| Cinoxacin          | CIN | 263.1 | 217.1 | 60  | 30 | $y = 7.81813e4 x + 7.63706e4$ (r = 0.99911)    |
|                    |     | 263.1 | 245   | 60  | 22 |                                                |
| Ofloxacin          | OFL | 362.3 | 318   | 140 | 26 | $y = 3.82777 x + -26.17728$ (r = 0.99293)      |
|                    |     | 362.3 | 261   | 140 | 38 |                                                |
| Enoxacin           | ENO | 321   | 303   | 80  | 24 | $y = 19382.27416 x + -2.55796e5$ (r = 0.99558) |
|                    |     | 321   | 234   | 80  | 30 |                                                |
| sulfaguanidine     | SGN | 215   | 108   | 45  | 33 | $y = 6574.36797 x + -1137.65126$ (r = 0.99918) |
|                    |     | 215   | 156   | 45  | 21 |                                                |
| Sulfamonomethoxine | SMM | 281.1 | 156   | 75  | 25 | $y = 27313.67611 x + -6.23530e4$ (r = 0.99796) |
|                    |     | 281.1 | 126.1 | 75  | 30 |                                                |
| Sulfaphenazole     | SPZ | 315   | 156   | 90  | 27 | $y = 7602.15002 x + -9116.64017$ (r = 0.99790) |
|                    |     | 315   | 108   | 90  | 40 |                                                |
| Sulfabenzamide     | SML | 277.1 | 156   | 60  | 19 | $y = 5556.30405 x + -2960.49409$ (r = 0.99901) |
|                    |     | 277.1 | 108   | 60  | 32 |                                                |
| Sulfapyridine      | SP  | 250.3 | 184.3 | 60  | 25 | $y = 5.04606e4 x + -5.42272e4$ (r = 0.99941)   |
|                    |     | 250.3 | 156.1 | 60  | 23 |                                                |
| sulphacetamide     | SCT | 215   | 156   | 52  | 17 | $y = 8665.96588 x + 1981.44157$ (r = 0.99774)  |

|                        |     |       |       |     |      |                                                  |
|------------------------|-----|-------|-------|-----|------|--------------------------------------------------|
|                        |     | 215   | 108   | 52  | 29   |                                                  |
| Sulfameter             | SM  | 281.2 | 215.3 | 60  | 25   | $y = 3.99794e4 x + -1.02087e5$ (r = 0.99753)     |
|                        |     | 281.2 | 156   | 60  | 25   |                                                  |
| Sulfamoxole            | SMO | 268.1 | 156.1 | 82  | 22   | $y = 11864.27026 x + -4.98844e4$ (r = 0.99400)   |
|                        |     | 268.1 | 113.2 | 82  | 25   |                                                  |
| Sulfamethazine         | SDD | 279.2 | 186.1 | 45  | 24   | $y = 26127.17727 x + -26705.78507$ (r = 0.99998) |
|                        |     | 279.2 | 124.2 | 45  | 33   |                                                  |
| Sulfadimethoxine       | SDT | 311.1 | 156.1 | 120 | 28   | $y = 10985.89562 x + -23605.21681$ (r = 0.99840) |
|                        |     | 311.1 | 108.2 | 140 | 47   |                                                  |
| Sulfisoxazole          | SFZ | 268.1 | 156.1 | 82  | 22   | $y = 8613.86568 x + -17904.40539$ (r = 0.99885)  |
|                        |     | 268.1 | 113.2 | 82  | 25   |                                                  |
| Sulfisomidin sodium    | SM2 | 279.2 | 186.1 | 70  | 23   | $y = 4.77166e4 x + -9.26982e4$ (r = 0.99027)     |
|                        |     | 279.2 | 124.4 | 70  | 30   |                                                  |
| Sulfamerazine          | SMZ | 265.2 | 172.1 | 70  | 23   | $y = 3.17758e4 x + -4.97038e4$ (r = 0.99898)     |
|                        |     | 265.2 | 156.1 | 70  | 23   |                                                  |
| Sulfamethoxazole       | SMX | 254.1 | 156   | 65  | 22   | $y = 25024.98229 x + -26878.81956$ (r = 0.99926) |
|                        |     | 254.1 | 108   | 65  | 36   |                                                  |
| Sulfamethizol          | SUZ | 271   | 156.2 | 30  | 19.3 | $y = 22092.77515 x + 20654.18070$ (r = 0.99683)  |
|                        |     | 271   | 108   | 30  | 35   |                                                  |
| Sulfamethoxydiazole    | TMP | 291.1 | 230.1 | 60  | 33   | $y = 1.20452e5 x + 17771.34695$ (r = 0.99998)    |
|                        |     | 291.1 | 123.1 | 95  | 34   |                                                  |
| Sulfadoxine            | SD  | 311.1 | 156.1 | 70  | 30   | $y = 6.84920e4 x + -5.74194e4$ (r = 0.99919)     |
|                        |     | 311.1 | 108.2 | 70  | 37   |                                                  |
| Sulfamethoxypyridazine | SMP | 281   | 126.1 | 75  | 27   | $y = 8.24300e4 x + -2.15302e5$ (r = 0.99233)     |
|                        |     | 281   | 156   | 75  | 25   |                                                  |
| Sulfachinoxalin        | SQ  | 301.1 | 156   | 120 | 22   | $y = 8226.04871 x + -10095.24078$ (r = 0.99589)  |

|                       |       |       |       |     |      |                                                 |
|-----------------------|-------|-------|-------|-----|------|-------------------------------------------------|
|                       |       | 301.1 | 92.2  | 120 | 40   |                                                 |
| Sulfachloropyridazine | SCP   | 285.1 | 156.1 | 21  | 20.3 |                                                 |
|                       |       | 285.1 | 92    | 21  | 39.2 | $y = 8174.75435 x + -11749.90166 (r = 0.99613)$ |
|                       |       |       |       |     |      |                                                 |
| Sulfadiazine          | SDZ   | 251.1 | 156   | 40  | 22   |                                                 |
|                       |       | 251.1 | 92    | 40  | 32.1 | $y = 22989.63498 x + -6.95711e4 (r = 0.99900)$  |
|                       |       |       |       |     |      |                                                 |
| Sulfathiazole         | STZ   | 256.1 | 156.1 | 38  | 21   |                                                 |
|                       |       | 256.1 | 108.1 | 38  | 31   | $y = 4.11978e4 x + -9.44579e4 (r = 0.99722)$    |
|                       |       |       |       |     |      |                                                 |
| Sulfanitran           | APNPS | 336.1 | 156.1 | 60  | 22   |                                                 |
|                       |       | 336.1 | 294   | 60  | 22   | $y = 1127.37928 x + 871.17006 (r = 0.99981)$    |
|                       |       |       |       |     |      |                                                 |
| Chlortetracycline     | CTC   | 479.2 | 462   | 120 | 24   |                                                 |
|                       |       | 479.2 | 444.1 | 120 | 31   | $y = 18094.13999 x + -8.08714e4 (r = 0.99814)$  |
|                       |       |       |       |     |      |                                                 |
| Minocycline           | MNO   | 458.2 | 441.2 | 130 | 25   |                                                 |
|                       |       | 458.2 | 352.2 | 130 | 40   | $y = 18922.01479 x + -1.97066e5 (r = 0.99847)$  |
|                       |       |       |       |     |      |                                                 |
| Doxycycline           | DOC   | 445.2 | 428.1 | 140 | 27   |                                                 |
|                       |       | 445.2 | 410.2 | 140 | 34   | $y = 2386.70360 x + -9036.47859 (r = 0.99866)$  |
|                       |       |       |       |     |      |                                                 |
| Tetracycline          | TC    | 445.2 | 427.3 | 120 | 19   |                                                 |
|                       |       | 445.2 | 410.3 | 120 | 27   | $y = 2724.20877 x + -4069.08738 (r = 0.99856)$  |
|                       |       |       |       |     |      |                                                 |
| Oxytetracycline       | OTC   | 461.3 | 443.2 | 100 | 19   |                                                 |
|                       |       | 461.3 | 426.2 | 100 | 27   | $y = 17835.89835 x + -7.16758e4 (r = 0.99988)$  |
|                       |       |       |       |     |      |                                                 |
| Florfenicol           | FLO   | 356   | 336   | -40 | -13  |                                                 |
|                       |       | 356   | 185   | -40 | -26  | $y = 14716.04272 x + 4.71798e4 (r = 0.99663)$   |
|                       |       |       |       |     |      |                                                 |
| Thiamphenicol         | THI   | 353.9 | 289.9 | -75 | -18  |                                                 |
|                       |       | 353.9 | 184.9 | -75 | -28  | $y = 8.97666e4 x + 22245.19261 (r = 0.99928)$   |
|                       |       |       |       |     |      |                                                 |
| Chloramphenicol       | CHP   | 321   | 257.1 | -40 | -15  |                                                 |
|                       |       | 321   | 152   | -40 | -24  | $y = 3.17541e4 x + 1.11640e5 (r = 0.99724)$     |
|                       |       |       |       |     |      |                                                 |
